# Supplementary material for: Eukaryotic translation initiation factor 3B accelerates the progression of esophageal squamous cell carcinoma by activating β-catenin signaling pathway
Source: PubMed Central journal article supplement (PMC5190032; doi:10.18632/oncotarget.9726), 2016-05-30
Supplement: oncotarget-07-43401-s001.pdf [file oncotarget-07-43401-s001.pdf]

## Eukaryotic translation initiation factor 3B accelerates the progression of esophageal squamous cell carcinoma by activating $\beta$ -catenin signaling pathway

### Supplementary Materials

**Supplementary Table S1: Analysis of the EIF3B expression in xenograft tumors of nude mice**

| Mouse No. | EIF3B expression intensity |            |
|-----------|----------------------------|------------|
|           | si-NC                      | si-EIF3B-3 |
| EC109-1   | 0                          | 1          |
| EC109-2   | 1                          | 2          |
| EC109-3   | 1                          | 2          |
| KYSE510-1 | 2                          | 3          |
| KYSE510-2 | 2                          | 3          |
| KYSE510-3 | 0                          | 2          |

<sup>a</sup>The staining intensity was scored as 0 (negative), 1 (weak), 2 (intermediate), or 3 (strong).

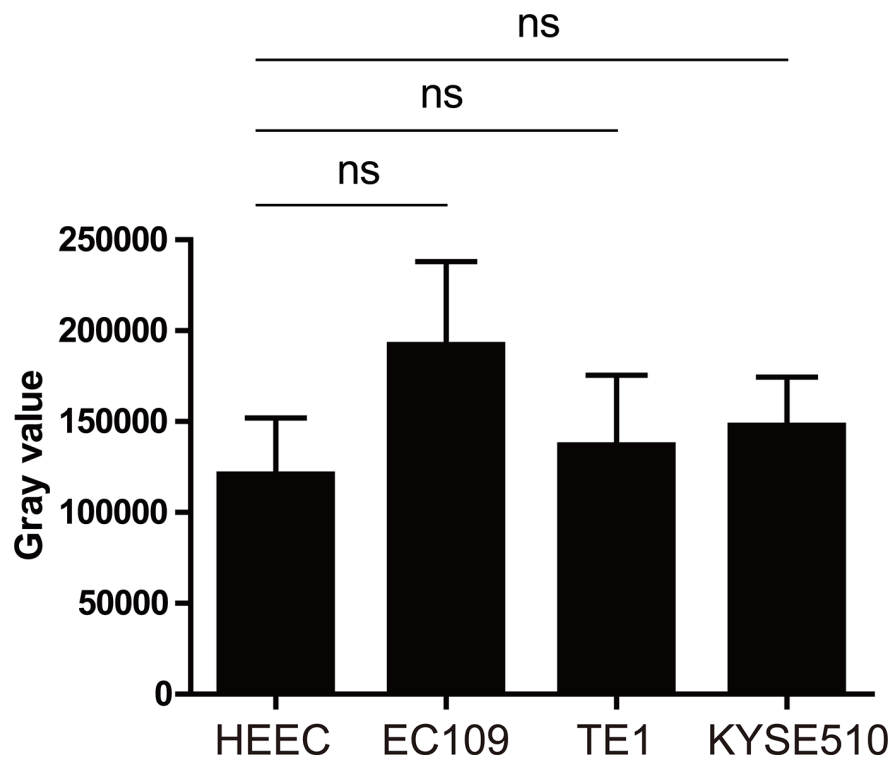

**Supplementary Figure S1: The gray values of protein level of EIF3B in cell lines.** The gray values of protein level of EIF3B in cell lines were analyzed by Image J. (ns: no significance, \* $p < 0.05$ , \*\* $p < 0.01$ , \*\*\* $p < 0.001$ ).

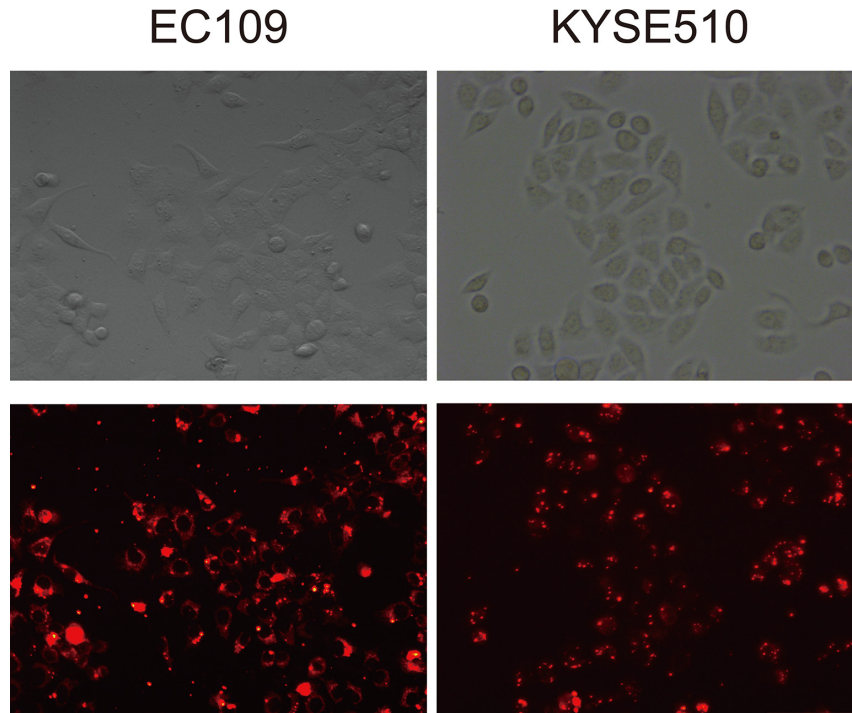

**Supplementary Figure S2: The efficiency of the transfection.** The efficiency of the transfection was detected according to Cy3-modified expression under light microscope (upper) and corresponding fluorescence microscope (lower) at 12 hours after transfection.

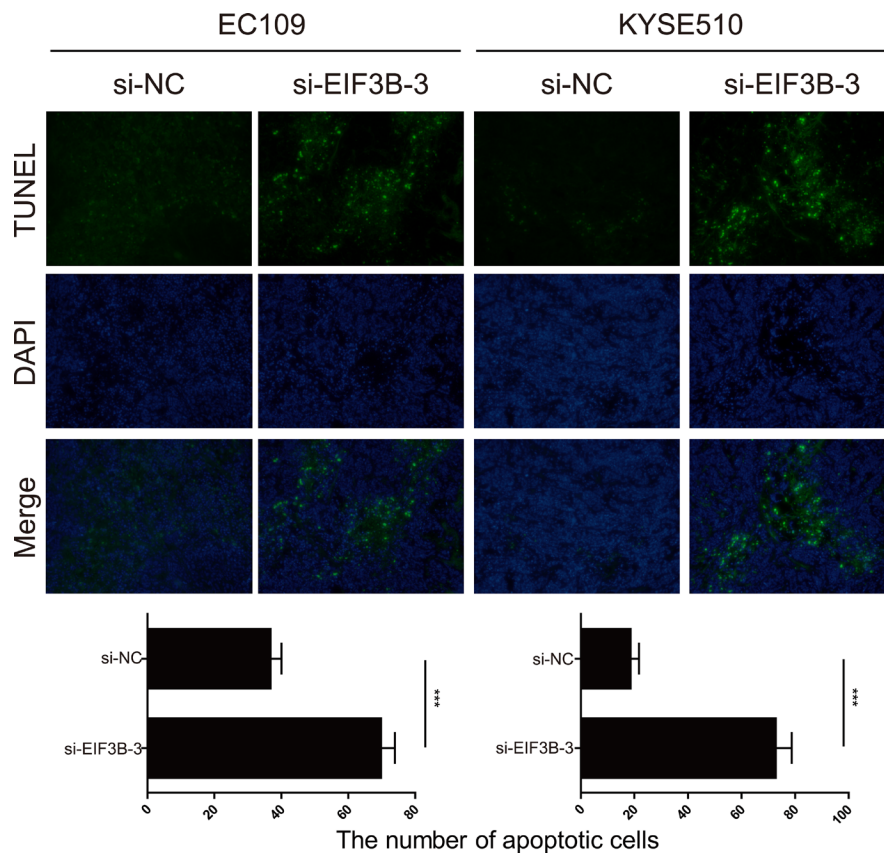

**Supplementary Figure S3: The apoptosis level of implanted tumors.** The apoptosis level of implanted tumors were detected by the TUNEL assay. The statistical figure below were corresponding analysis of difference of apoptosis after knockdown of EIF3B (ns: no significance, \* $p < 0.05$ , \*\* $p < 0.01$ , \*\*\* $p < 0.001$ ).

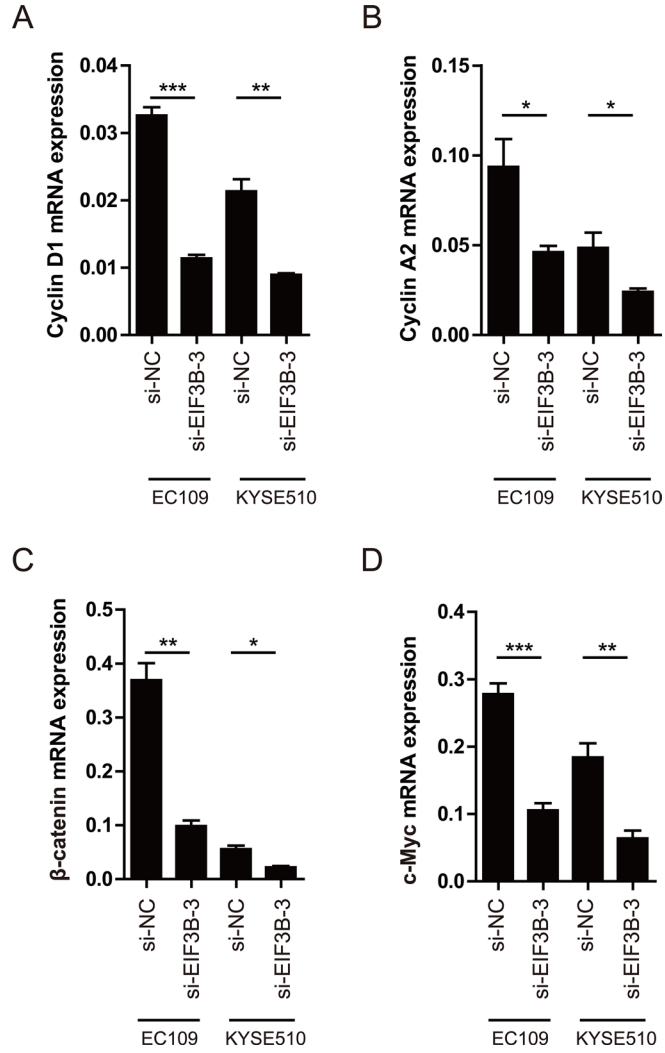

**Supplementary Figure S4: Related mRNA expression level after knockdown of EIF3B.** RT-PCR was performed to analyze the shift of related mRNA expression level after knockdown of EIF3B. (A) Cyclin D1. (B) Cyclin A2. (C) β-catenin. (D) c-Myc (ns: no significance, \* $p < 0.05$ , \*\* $p < 0.01$ , \*\*\* $p < 0.001$ ).
